# Supplementary figures and images for: Progressive Mitochondrial SOD1G93A Accumulation Causes Severe Structural, Metabolic and Functional Aberrations through OPA1 Down-Regulation in a Mouse Model of Amyotrophic Lateral Sclerosis
Source: MDPI journal article supplement (doi:10.3390/ijms22158194), 2021-07-30

**A**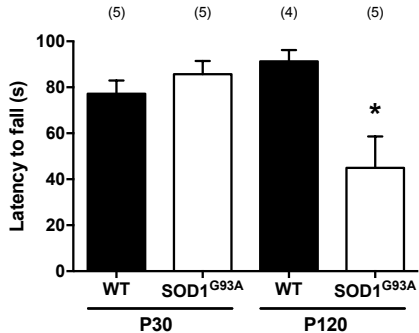**B**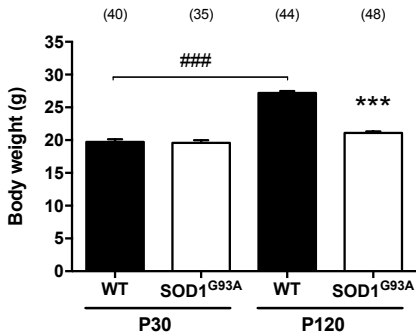

**Supplementary figure S1**

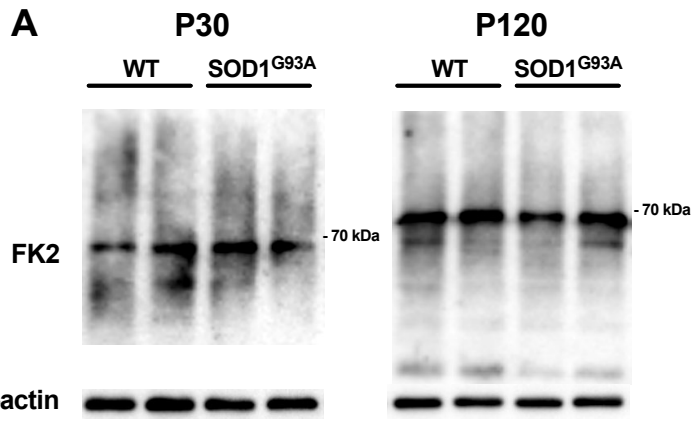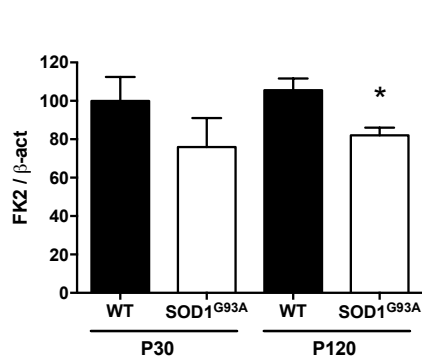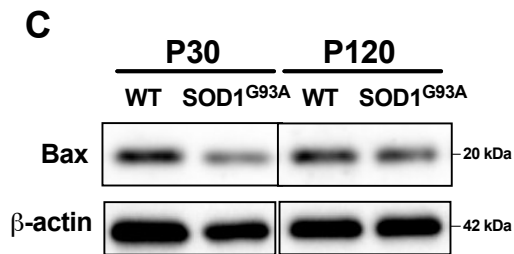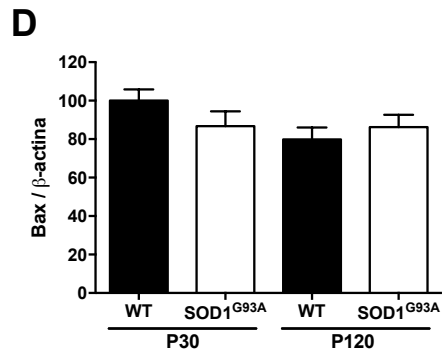

**Supplementary figure S2**

Supplement: s1 [file s1]
